# Supplementary figures and images for: Climatology and Surface Impacts of Atmospheric Rivers on West Antarctica
Source: Copernicus journal article supplement (doi:10.5194/tc-2022-101), 2022-06-22

Sub-surface (~1m) thermistor temperatures, Cavity AMIGOS

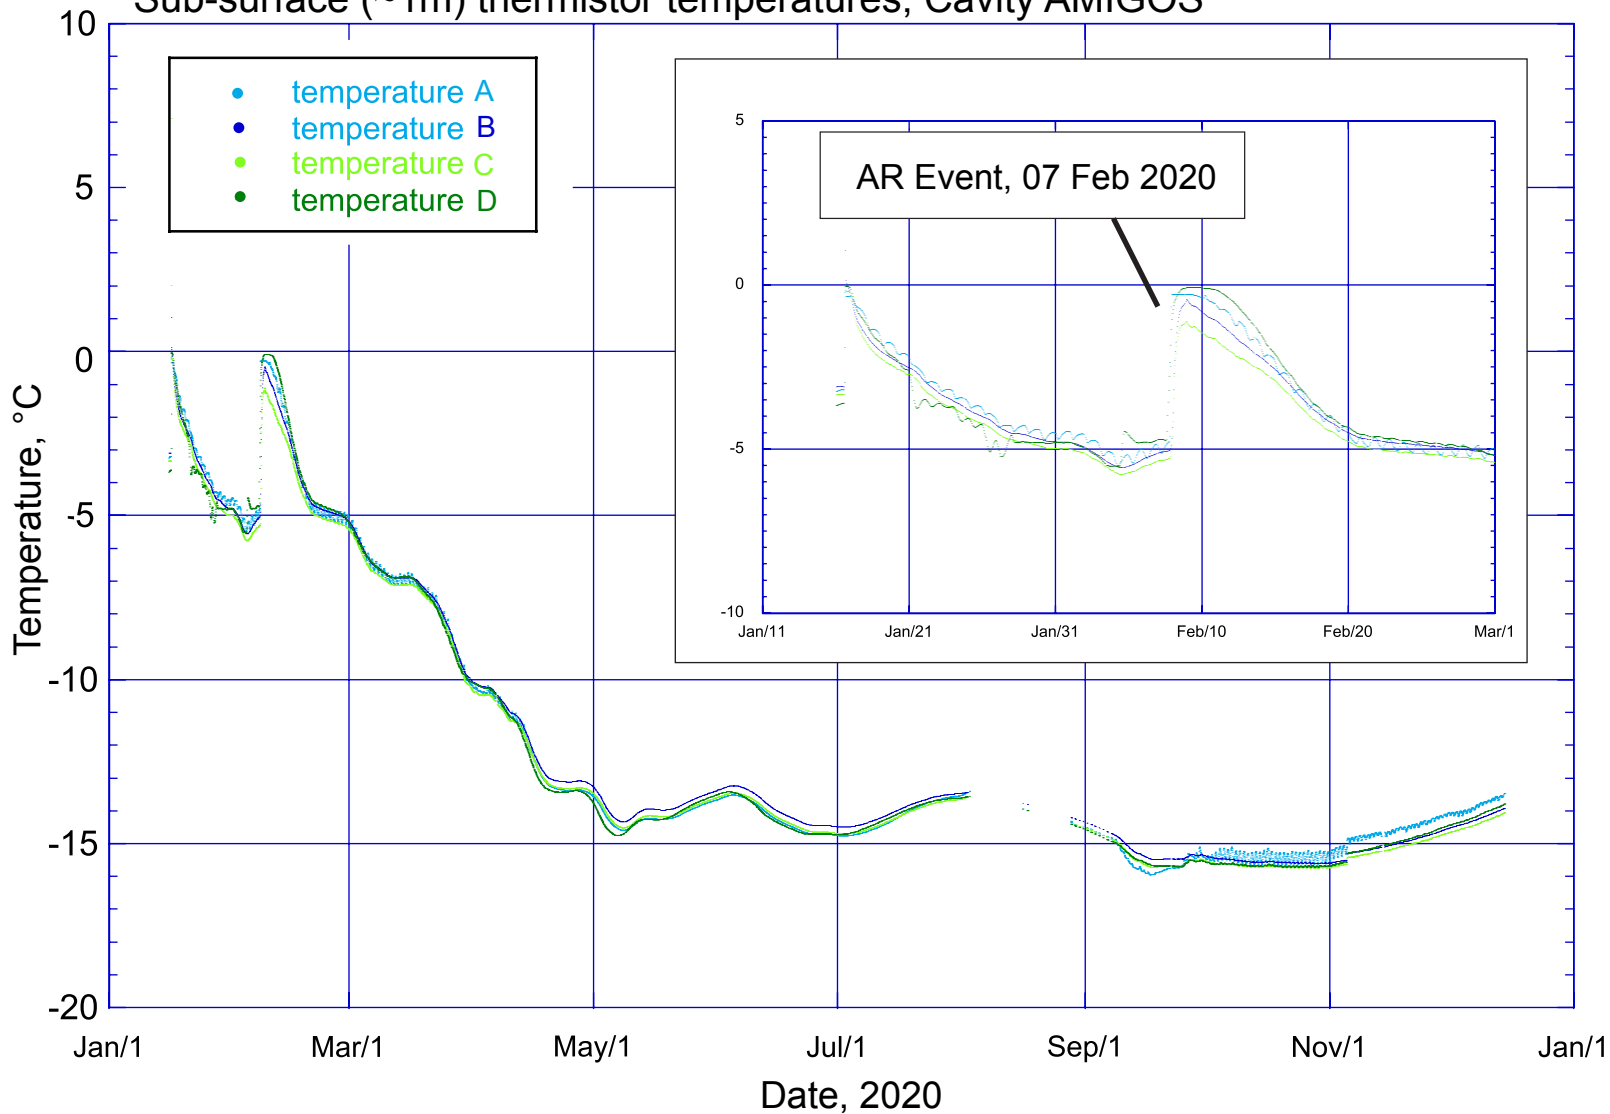

Supplement: Supplementary file 1 [file tc-2022-101-supplement.zip]
